# Supplementary material for: Hierarchical NiCo2O4@MnO2core–shell heterostructured nanowire arrays on Ni foam as high-performance supercapacitor electrodes
Source: Royal Society of Chemistry journal article supplement (doi:10.1039/c2cc37117k), 2012-11-06
Supplement: c2cc37117k.pdf [file c2cc37117k.pdf]

## Electronic Supplementary Information

---

### **Hierarchical NiCo<sub>2</sub>O<sub>4</sub>@MnO<sub>2</sub> core-shell heterostructured nanowire arrays on Ni foam as high-performance supercapacitor electrodes**

*Le Yu, Genqiang Zhang, Changzhou Yuan, and Xiong Wen (David) Lou \**

School of Chemical and Biomedical Engineering, Nanyang Technological University, 62 Nanyang

Drive, Singapore 637459. Email: [xwlou@ntu.edu.sg](mailto:xwlou@ntu.edu.sg)

Webpage: <http://www.ntu.edu.sg/home/xwlou/>

## Experimental Section

*Materials Synthesis.* In a typical synthesis, Ni foam (2 cm x 10 cm in rectangular shape) was immersed in a 3 M HCl solution for 15 min to get rid of the surface oxide layer. 1.16 g of  $\text{Co}(\text{NO}_3)_2 \cdot 6\text{H}_2\text{O}$ , 0.58 g of  $\text{Ni}(\text{NO}_3)_2 \cdot 6\text{H}_2\text{O}$  and 1.44 g of urea were dissolved in 160 mL of mixed solution with ethanol and  $\text{H}_2\text{O}$  ( $V : V = 1 : 1$ ) at room temperature to form a clear pink solution. The solution was transferred into a 250 mL bottle, and the pretreated Ni foam was placed in the bottle. Then, the bottle was capped tightly, heated to 90 °C and maintained at the temperature for 8 h in an electric oven. After cleaned with the assistance of ultrasonication and dried in air at 60 °C, the Ni foam with grown precursor was further put into a 40 mL Teflon-lined stainless steel autoclave containing 1.6 mM  $\text{KMnO}_4$  solution, which was subsequently heated to and maintained at 160 °C for 30 min. For comparison, 14 and 28 mM  $\text{KMnO}_4$  solutions were further used to fabricate other  $\text{NiCo}_2\text{O}_4 @ \text{MnO}_2$  core-shell NW arrays. Finally, the Ni foam with the as-grown hybrid precursor arrays was annealed at 350 °C for 2 h to obtain hierarchical  $\text{NiCo}_2\text{O}_4 @ \text{MnO}_2$  core-shell heterostructured NW arrays grown on Ni foam. As a control, the  $\text{NiCo}_2\text{O}_4$  NW arrays supported on Ni foam were also obtained under the same condition but without the following coating of the  $\text{MnO}_2$  phase.

*Materials Characterization.* X-ray diffraction (XRD) patterns were collected on a Bruker D2 Phaser X-Ray Diffractometer with Ni filtered Cu  $K\alpha$  radiation ( $\lambda = 1.5406 \text{ \AA}$ ) at a voltage of 30 kV and a current of 10 mA. Field-emission scanning electron microscope (FESEM) images and energy dispersive X-ray spectroscopy (EDX) spectra were acquired on a JEOL JSM 6700F microscope operated at 5 kV. Transmission electron microscope (TEM) images were taken on JEOL 2010 and JEOL 2100F microscopes.

*Electrochemical Measurements.* Electrochemical measurements (CHI 660D electrochemical workstation) were conducted in a three-electrode configuration at room temperature using a 1.0 M LiOH as electrolyte. The nickel foam supported electroactive materials ( $\sim 1 \text{ cm}^2$  in area) serves directly as the working electrode. Pt foil and standard calomel electrode (SCE) were used as the counter electrode and the reference electrode, respectively. The mass loading of the hybrid  $\text{NiCo}_2\text{O}_4@\text{MnO}_2$  core-shell NWs on Ni foam is about  $1.4 \text{ mg cm}^{-2}$ . Meanwhile, the mass loading of the  $\text{NiCo}_2\text{O}_4$  NWs on Ni foam is about  $1.15 \text{ mg cm}^{-2}$ . The area specific capacitance of the electrodes was calculated from the CP curves based on equation (1):

$$C = \frac{It}{\Delta V} \quad (1)$$

where  $C$ ,  $I$ ,  $t$  and  $\Delta V$  are the SC ( $\text{F cm}^{-2}$ ) of the electroactive materials, the discharging current density ( $\text{A cm}^{-2}$ ), the discharging time (s), and the discharging potential range (V), respectively. Electrochemical impedance spectroscopy (EIS) measurements were carried out by applying an AC voltage with 1 mV amplitude in a frequency range from 0.1 Hz to 100 kHz at open circuit potential.

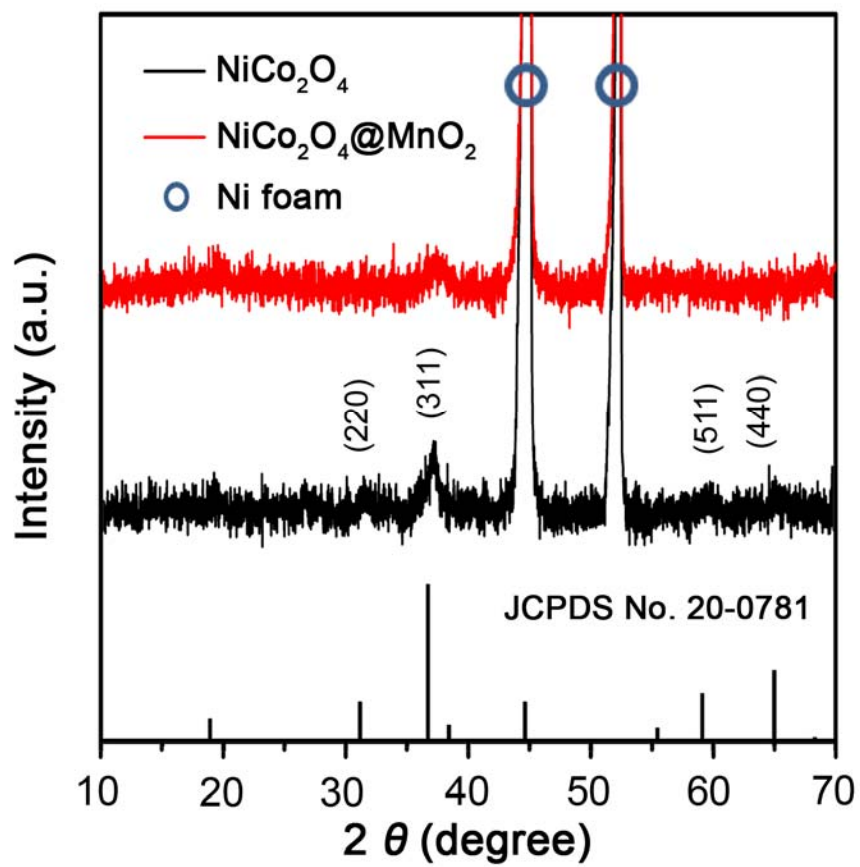

**Fig. S1** XRD patterns of  $\text{NiCo}_2\text{O}_4$  NW arrays and hierarchical  $\text{NiCo}_2\text{O}_4@\text{MnO}_2$  core-shell heterostructured NW arrays on Ni foam

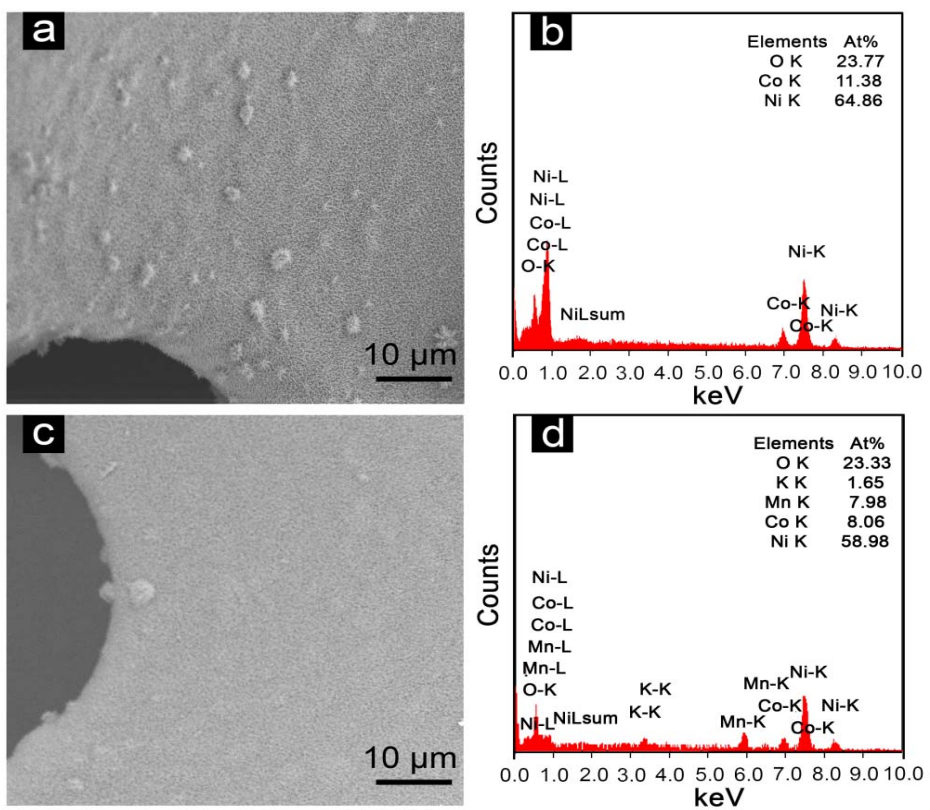

**Fig. S2** Typical FESEM images and corresponding EDX data of (a, b) NiCo<sub>2</sub>O<sub>4</sub> and (c, d) hierarchical NiCo<sub>2</sub>O<sub>4</sub>@MnO<sub>2</sub> core-shell NW arrays grown on Ni foam.

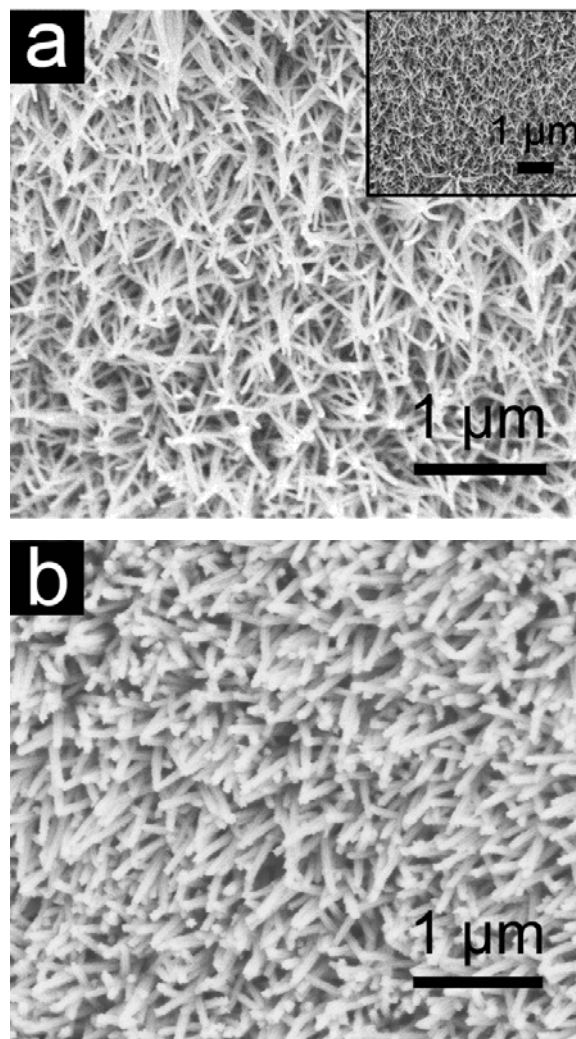

**Fig. S3** Low-magnification FESEM images of (a) derived NiCo<sub>2</sub>O<sub>4</sub> NW arrays and (b) hierarchical NiCo<sub>2</sub>O<sub>4</sub>@MnO<sub>2</sub> core-shell NW arrays grown on Ni foam. (The inset in (a) shows the precursor of NiCo<sub>2</sub>O<sub>4</sub> NW arrays supported on Ni foam).

As seen from Fig. S3a, after the annealing treatment at 350 °C, the NiCo<sub>2</sub>O<sub>4</sub> NW arrays sample maintain the same morphology as its precursor (the inset in a) without any noticeable alteration. Moreover, both the NiCo<sub>2</sub>O<sub>4</sub> NW arrays and hierarchical NiCo<sub>2</sub>O<sub>4</sub>@MnO<sub>2</sub> core-shell NW arrays were uniformly grown on Ni foam on a large scale.

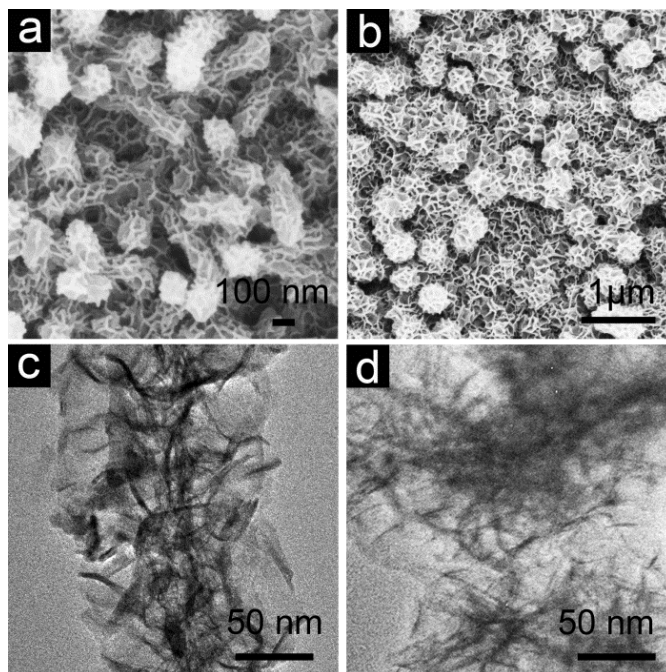

**Fig. S4** FESEM and TEM images of as-fabricated hierarchical  $\text{NiCo}_2\text{O}_4@\text{MnO}_2$  core-shell NW arrays grown on Ni foam by using  $\text{KMnO}_4$  solutions with different concentrations: (a, c) 14 mM and (b, d) 28 mM.

Clearly, when the higher concentration of  $\text{KMnO}_4$  is used, much thicker  $\text{MnO}_2$  layer can be seen. In the case of 14 mM  $\text{KMnO}_4$ , the shell thickness of ultrathin  $\text{MnO}_2$  nanoflakes is *ca.* 50 nm. When the  $\text{KMnO}_4$  concentration is increased to 28 mM, the thickness of  $\text{MnO}_2$  layer increases up to *ca.* 100 nm.



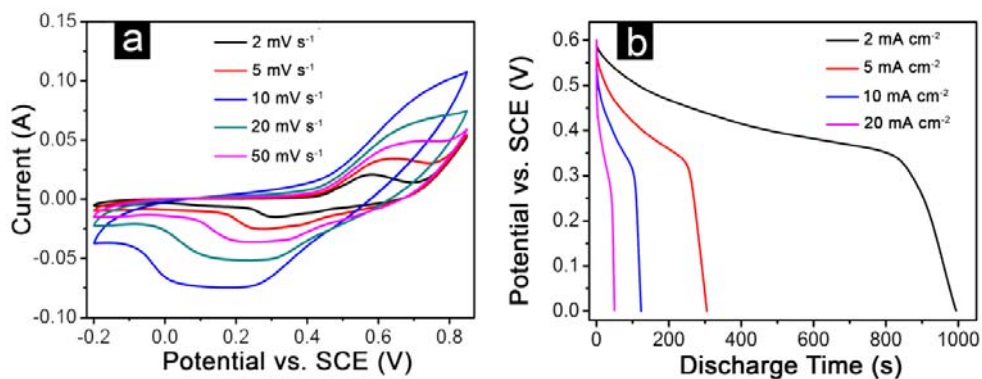

**Fig. S5** Electrochemical characterizations of the hierarchical NiCo<sub>2</sub>O<sub>4</sub>@MnO<sub>2</sub> core-shell NW arrays grown on Ni foam: (a) CVs curves at various scan rates ranging from 2 to 50 mV s<sup>-1</sup>, (b) discharge voltage profiles at different current densities.

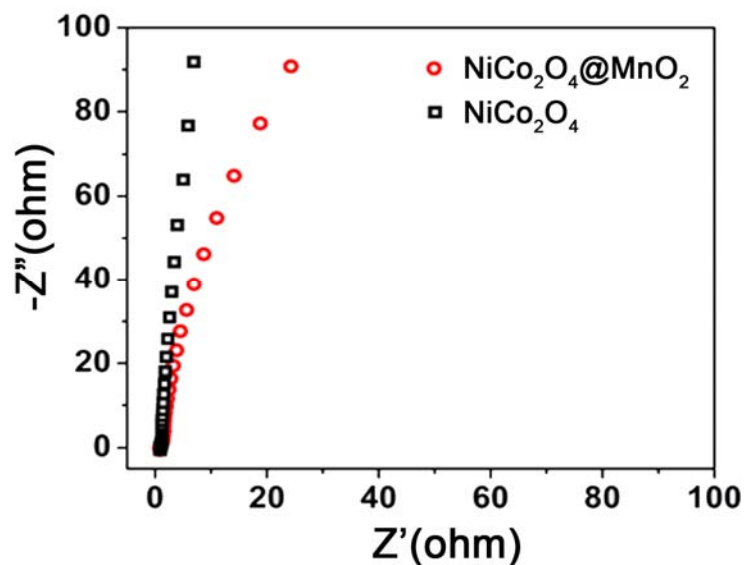

**Fig. S6** Impedance Nyquist plots of the MnO<sub>2</sub>, NiCo<sub>2</sub>O<sub>4</sub> NW arrays and the hierarchical NiCo<sub>2</sub>O<sub>4</sub>@MnO<sub>2</sub> core-shell NW arrays grown on Ni foam at open circuit potential.
